# Supplementary material
Source: PubMed Central journal article supplement (PMC3110984)
Supplement: NIHMS216104-supplement-1.pdf [file NIHMS216104-supplement-1.pdf]

Although we were unable to visualize newly recruited lymphatic vessels in the single imaging session, we were able to track changes in edema using surface profilometry. Given the small doses of ICG employed and its normally rapid clearance from the body, repeated dosing for multiple, longitudinal NIR fluorescence imaging sessions could be used to track progress in increasing contractile lymphatic activity and recruitment of vessels. Additional patients need to be imaged in the manner described herein in order to evaluate the reproducibility and incidence of our findings. In expanded studies, the imaging technique may also provide new insights on the impact of cancer metastasis and its treatment on regional lymphatic structure and function.

## **Acknowledgment**

This work was supported in parts by the Longaberger Foundation through an American Cancer Society Research Scholar Grant (RSG-06-213-01-LR) and the National Institutes of Health (R01 HL092923 and U54 CA136404). The authors acknowledge Ms. Lisa Kinder from Memorial Hermann Center for Lymphedema Management for performing MLD in this study.

## **Supplemental Material**

Video 1: Pulsing at right eye.

Video 2: Pulsing at left eye.
